# Supplementary material
Source: MDPI journal article supplement (https://www.mdpi.com/2076-3417/10/11/4000)
Supplement: s1 [file s1]

## Sheet: LDF perfusion
Laser Doppler Flowmetry
Animal		Phase 1	Phase 2	Phase 3	DII-I	DIII-I	DIII-II
#1	X	82.2	97.1	98.8	18.1265	20.1946	1.75077
	SD	8.9	12.6	11.6
#2	X	103.5	127.1	147.8	22.8019	42.8019	16.2864
	SD	11.9	12.7	13
#3	X	182.1	229	252.1	25.7551	38.4404	10.0873
	SD	38.8	54.3	46.4
#5	X	118.6	139.3	165.4	17.4536	39.4604	18.7365
	SD	10.4	16.9	14.1
#8	X	153.4	194.2	312	26.5971	103.39	60.6591
	SD	20.7	49.8	43.7
#9	X	150.9	153.9	138.1	1.98807	-8.48244	-10.2664
	SD	10.8	16.7	10.8
#11	X	234.3	263.3	322.6	12.3773	37.6867	22.5218
	SD	40.6	28.5	36
	X	146.429	171.986	205.257	17.8714	39.0702	17.1108
	SD	51.3242	59.3021	89.5272	8.61497	33.593	22.2255
	p	-	0.018*	0.028*

## Sheet: CardiResp
	Heart Rate - ECG					Respiratory Rate - Spyro
	Animal	Phase 1	Phase 2	Phase 3		Animal	Phase 1	Phase 2	Phase 3
	#1	275	326	341		#1	211	228	232
	#2	293.315	325.75	353.839		#2	235.783	243.472	247.16
	#3	302.107	310.47	319.704		#3	212.825	223.077	226.438
	#8	280.921	311.835	349.795		#8	189.193	203.264	216.309
	#11	306.916	309.447	322.278		#11	218.13	215.151	201.821
	X	291.652	316.701	337.323		X	213.386	222.593	224.746
	SD	13.5784	8.41841	15.6415		SD	16.6991	14.9533	16.9897
	p	-	0.043*	0.043*		p	-	0.08	0.225

## Sheet: Components Analysis
		COMPONENTS ACTIVITY
		card1	card2	card3	resp1	resp2	resp3	mio1	mio2	mio3	sim1	sim2	sim3	nod1	nod2	nod3	noi1	noi2	noi3
	#1	5.54572	3.89324	3.46968	5.46662	4.16909	3.96891	19.7116	37.4758	30.3364	23.4494	28.2504	23.2838	11.2122	8.98317	11.1646	16.5916	15.6215	13.7196
	#2	6.50164	5.84177	4.71125	4.36795	5.05246	3.91928	13.1138	18.6959	20.2427	23.4758	37.6175	28.3699	9.27517	19.732	15.7482	28.8021	21.6864	12.9062
	#3	4.57138	5.62482	5.03207	1.43532	1.79299	1.65229	42.8554	39.9729	35.1382	20.6626	35.9624	29.9783	9.94513	10.1652	8.9481	12.1125	10.6208	11.4748
	#4	3.83023	3.93314	3.09934	4.06806	4.98972	4.25037	18.4552	19.6188	20.1247	19.0925	37.532	24.2923	13.451	12.1079	11.8246	23.8768	18.1697	17.8638
	#5	5.46791	3.28694	3.54821	2.92179	2.06909	1.82427	29.9748	32.1645	19.2923	14.7784	27.8989	25.3808	8.20109	20.9684	18.017	22.9334	32.083	27.1756
	#6	3.85272	2.11207	2.09979	4.17007	2.27301	2.0284	18.9191	18.8044	21.7517	25.6113	44.9332	32.0053	16.0539	35.7207	20.9199	16.1751	34.5533	14.2715
	X	4.9616	4.11533	3.66006	3.7383	3.39106	2.94059	23.8383	27.7887	24.481	21.1783	35.3657	27.2184	11.3564	17.9462	14.4371	20.0819	22.1224	16.2353
	SD	1.06124	1.41711	1.07564	1.38918	1.51478	1.22219	10.8123	9.91551	6.62078	3.89006	6.45038	3.44316	2.92416	10.0321	4.56562	6.1568	9.4245	5.76668
	p	-	0.173	0.046*	-	0.463	0.116	-	0.249	0.917	-	0.028*	0.046*	-	0.249	0.345	-	0.917	0.173
